1 Running header: *Myotis septentrionalis* roost selection

2 **Roost selection by male northern long-eared bats (*Myotis***  
3 ***septentrionalis*) at their western range edge**

4  
5 Jesse M. Alston<sup>\*</sup>, Ian M. Abernethy, Douglas A. Keinath, and Jacob R. Goheen

6  
7 *Department of Zoology and Physiology, University of Wyoming, Laramie, WY 82071, USA;*

8 *Wyoming Natural Diversity Database, University of Wyoming, Laramie, WY 82071, USA;*

9 [jalston@uwyo.edu](mailto:jalston@uwyo.edu) (JMA) / *Wyoming Natural Diversity Database, University of Wyoming,*

10 *Laramie, WY 82071, USA;* [fisher@uwyo.edu](mailto:fisher@uwyo.edu) (IMA) / *Wyoming Ecological Services Field Office,*

11 *U. S. Fish and Wildlife Service, Cheyenne, WY 82009, USA;* [douglas.keinath@fws.gov](mailto:douglas.keinath@fws.gov) (DAK) /

12 *Department of Zoology and Physiology, University of Wyoming, Laramie, WY 82071, USA;*

13 [jgoheen@uwyo.edu](mailto:jgoheen@uwyo.edu) (JRG)

14

15 \*Correspondent: [jalston@uwyo.edu](mailto:jalston@uwyo.edu)

16

17 **ABSTRACT**

18 Conservation in multi-use landscapes requires identifying and conserving critical resources for

19 imperiled species because those resources may otherwise be destroyed or degraded by human

20 activity. Summer day-roost sites are critical resources for bats, so conserving roost sites is thus

21 an important component of many bat conservation plans. We used VHF telemetry to identify and

22 characterize summer day-roost selection by male northern long-eared bats (*Myotis*

23 *septentrionalis*) at the western edge of their range in South Dakota, USA. We tracked 18 bats to

24 43 tree roosts and used an information theoretic approach to determine the relative importance of  
25 tree- and plot-level characteristics on roost site selection. Bats selected roost trees that were  
26 larger in diameter, more decayed, closer to more snags, and under denser canopy than other trees  
27 available on the landscape. Protecting large-diameter snags within intact forest is important for  
28 the conservation of this federally threatened species, particularly along the western edge of its  
29 range where it may be subject to range contraction and local extinction. Protecting short ( $\leq 3$  m)  
30 snags in particular may be a low-risk, high-reward strategy for conservation of resources  
31 important to male northern long-eared bats.

32

33 *Key words: bats, Black Hills, Chiroptera, forest management, habitat use, peripheral*  
34 *populations, ponderosa pine (Pinus ponderosa), radiotelemetry*

35

36

## INTRODUCTION

37 Habitat degradation by humans is a leading cause of extinction and population declines  
38 for species globally (Dobson et al. 1997; Halpern et al. 2008; Hansen et al. 2013). Less than 15%  
39 of Earth's land surface falls within a protected area, and less than half of that area is free from  
40 human development, agriculture, livestock grazing, light pollution, and transportation  
41 infrastructure (Jones et al. 2018). Even in relatively undisturbed areas, land uses other than  
42 conservation of nature—such as wildfire prevention, livestock grazing, recreation, and extraction  
43 of timber and other forest products—are the norm rather than the exception. Conservation  
44 measures targeting these multi-use landscapes are thus vital for conserving species (Kremen and  
45 Merenlender 2018).

46           Some species and populations are at greater risk from human pressure than others. For  
47 example, species that use only one or a few resources of a particular type (e.g., food, nest sites)  
48 may be especially susceptible to loss of that resource (Safi and Kerth 2004; Sagot and Chaverri  
49 2015). Typically, populations at range edges are also more prone to local extinction and have  
50 lower growth rates, so loss of critical resources (i.e., resources required for species persistence)  
51 at range edges should be more likely to trigger range contraction relative to more interior  
52 populations (Yackulic et al. 2011). Additionally, populations at range edges are often of  
53 conservation concern even when they are common or geographically widespread because  
54 political boundaries isolate peripheral populations within management units that do not consider  
55 larger populations in neighboring political jurisdictions (Hunter and Hutchinson 1994; Lesica  
56 and Allendorf 1995).

57           Successful conservation in multi-use landscapes often requires the identification of  
58 critical resources for species of conservation concern so that the supply of those critical resources  
59 can be maintained or increased. Day-roosts appear to be critical resources for many bats,  
60 providing shelter from predators and environmental stressors (Fenton et al. 1994; Solick and  
61 Barclay 2006), communal sites for social interactions (Willis and Brigham 2004), and secure  
62 places to raise young (Kunz 1982). Bats spend most of their time in day-roosts, alone or in  
63 groups of up to millions of individuals, depending on sex and species. Patterns of bat abundance  
64 and distribution are correlated with roost availability (Humphrey 1975), and declines in  
65 reproductive success have been documented when pregnant or lactating bats are experimentally  
66 excluded from preferred roosts (Brigham and Fenton 1986). Because day-roosts are so important  
67 for bats, measures to conserve roosts feature prominently in bat conservation plans. Resource  
68 managers seeking to conserve bats while managing landscapes for multiple uses could benefit

69 from knowledge of roost characteristics that promotes bat roost conservation, particularly for  
70 populations at range edges.

71 We evaluated day-roost selection by northern long-eared bats (*Myotis septentrionalis*) in  
72 a ponderosa pine forest in the Black Hills of South Dakota, USA. Our study population inhabits  
73 an intensively logged landscape at the western edge of this species' range. Northern long-eared  
74 bats inhabit much of the eastern United States and southern Canada (Caceres and Barclay 2000),  
75 but are increasingly threatened by white nose syndrome and have thus been protected under the  
76 Endangered Species Act since 2015. Throughout their range, northern long-eared bats roost  
77 almost exclusively in tree cavities and under sloughing bark within intact forest (Lacki et al.  
78 2009), and forage within forests or at forest edges (Owen et al. 2003; Patriquin and Barclay  
79 2003; Henderson and Broders 2008). At our study site and other high elevation areas in the  
80 Black Hills, males are much more common than females (Choate and Anderson 1997; Cryan et  
81 al. 2000), and are thus important for maintaining bat populations in these areas.

82 To evaluate factors driving roost selection, we tracked adult male northern long-eared  
83 bats to day-roosts and quantified characteristics of both used and available roost trees using  
84 variables easily measured by forest managers. We evaluated these data using an information-  
85 theoretic approach to select the best models from a suite of candidate models. We hypothesized  
86 that in this intensively logged ecosystem, bats primarily select roost trees with characteristics that  
87 promote cavity formation (e.g., tree size and amount of decay) and thermal characteristics  
88 suitable for behavioral thermoregulation (e.g., canopy cover and orientation in relation to  
89 sunlight).

90

91

## MATERIALS AND METHODS

92            *Study Area.* We conducted our study during the summers of 2017 and 2018 on Jewel  
93 Cave National Monument (43° 45' N, 103° 45' W) and surrounding areas of Black Hills National  
94 Forest, 16 km west of Custer, South Dakota, USA. In this area, mean monthly summer high  
95 temperatures range between 22 – 27° C and mean monthly summer precipitation ranges between  
96 60 – 80 mm (Western Regional Climate Center 2018). Open ponderosa pine (*Pinus ponderosa*)  
97 forests dominate our study site, with Rocky Mountain juniper (*Juniperus scopulorum*) and  
98 quaking aspen (*Populus tremuloides*) occurring locally. Forests are actively managed to prevent  
99 wildfire, and those managed by the US Forest Service and private landowners also undergo  
100 intensive logging. Forests form a heterogeneous mosaic with northern mixed-grass prairie where  
101 a large stand-replacing fire occurred in our study area in 2000. A large cave system and several  
102 smaller caves lie underground at our study site, and there is substantial topographic relief on the  
103 landscape in the form of intersecting canyon systems and rock outcrops.

104            *Capture and VHF Telemetry.* We used mist nets to capture bats over permanent and  
105 semi-permanent water sources (e.g., springs, stock tanks, and stock ponds). In summer (Jun–  
106 Aug) 2017 and 2018, we netted 20 and 49 nights at 9 and 15 water sources, respectively. We  
107 opened mist nets at civil sunset and closed them after five hours and during inclement weather.  
108 We affixed VHF transmitters (LB-2X model .28 g – Holohil Systems Ltd., Carp, ON, Canada;  
109 .25 g model – Blackburn, Nacogdoches, TX, USA) between the scapulae of adult male northern  
110 long-eared bats with latex surgical adhesive (Osto-Bond, Montreal Ostomy, Montreal, QC,  
111 Canada). In our study area and others in the regions (Cryan et al. 2000), sex ratios are biased  
112 heavily toward males. Because patterns of roost selection differ between male and female bats  
113 (Elmore et al. 2004; Hein et al. 2008), we targeted males specifically. Additionally, the roosting  
114 habits of male bats are less studied than those of females—only 2 of the 14 peer-reviewed studies

115 on roost selection of northern long-eared bats focus on males, and 11 out of 111 peer-reviewed  
116 studies on roost selection of bats in general focus on males (J. Alston, unpublished data). All  
117 transmitters weighed <5% of the mass of the bat (Aldridge and Brigham 1988). We tracked bats  
118 to roosts each day transmitters were active. All protocols were approved by the University of  
119 Wyoming and National Park Service Animal Care and Use Committees and met guidelines  
120 approved by the American Society of Mammalogists (Sikes 2016).

121 *Roost Characterization.* To characterize roosts, we collected data for each roost and  
122 randomly sampled potential roost trees in our study area. We identified potential roost trees by  
123 generating a sample of 200 random points within 2.53 km (the farthest distance we located a bat  
124 roosting from its capture site during our study) of sites where we captured northern long-eared  
125 bats and selecting the nearest potential roost tree at a random bearing from each point. We  
126 defined potential roost trees as live trees >20 cm in diameter or any dead tree with a visible  
127 defect (e.g. sloughing bark or cavities) sufficiently large for a bat to roost within. For each tree  
128 and plot, we measured characteristics that may influence roost suitability (Table 1). We  
129 measured vegetation characteristics at two spatial scales: 1) individual trees, and 2) a 706.86 m<sup>2</sup>  
130 (15 m radius) plot around the tree. We also measured topographic variables at the plot scale.

131 *Statistical Analysis.* To quantify differences between roost trees used by northern long-  
132 eared bats and randomly sampled available roost trees, we used the R statistical software  
133 environment (R Core Team 2018) to build binomial-family generalized linear models in a use-  
134 availability sampling design (Manly et al. 2007). We employed an information theoretic  
135 approach using Akaike's Information Criterion adjusted for small sample sizes (AIC<sub>c</sub>) to  
136 compare competing models (Burnham et al. 2002) using the 'MuMIn' package (Barton 2018).  
137 We calculated AIC<sub>c</sub> values and model weights ( $w_i$ ) for all possible combinations of a maximum

138 of 8 predictors (one variable for each 5 observations) in our set of candidate models to prevent  
139 bias and unreliable confidence interval coverage (Vittinghoff and McCulloch 2007). Predictors  
140 with variance inflation factors  $> 10$  were removed from consideration in our global model to  
141 reduce problems associated with multicollinearity (Kutner 2005). We averaged model  
142 coefficients for all models with cumulative  $w_i > .95$  (Burnham et al. 2002). Finally, we validated  
143 our averaged model using area under the receiver operating characteristic curve (AUC; Swets  
144 1988; Manel et al. 2001).

145

146

## RESULTS

147 We located 44 roosts used by 18 bats during our study. Aside from one roost in a rock  
148 crevice, bats roosted exclusively in ponderosa pines, either in cavities or under loose bark.  
149 Thirty-six out of 43 tree roosts (83.7%) occurred in snags. We found  $2.4 \pm 0.3$  (range: 1-5) roost  
150 trees per bat. Bats typically roosted in the same patch of contiguous forest for the active life of  
151 the transmitter. Bats roosted  $790 \pm 90$  m (range: 55 – 2,530 m) from the sites at which they were  
152 captured.

153 Our global model distinguishing used roost trees from available roost trees incorporated  
154 DBH, tree height, decay class (*sensu* Maser et al. 1979), slope, aspect (split into two  
155 components—eastness and southness), percent bark remaining, plot tree density, plot snag  
156 density, plot canopy cover, and interaction terms between slope and eastness and slope and  
157 southness. The global model provided an adequate fit to the data (le Cessie-van Houwelingen-  
158 Copas-Hosmer global goodness of fit test;  $z = 0.806$ ,  $p = 0.420$ ). Our averaged model indicated  
159 that DBH, decay class, snag density, and canopy cover were important variables (Table 2).  
160 Significant averaged model coefficients, confidence intervals, and scaled and unscaled odds

161 ratios are reported in Table 2. Mean differences between used and available roost trees among  
162 significant variables are reported in Table 3. Predictive performance of the averaged model was  
163 high (AUC = 0.924).

164 Four variables (DBH, decay class, plot snag density, and canopy cover) were all  
165 positively related to roost selection (Fig. 1; Supplementary Data SD1). For each 5 cm increase in  
166 DBH, odds of selection increased by 61% (CI: 21-113%). For each 1 unit increase in decay class,  
167 odds of selection increased by 111% (CI: 47-203%). For each additional snag within a 15 m  
168 radius of the roost tree, odds of selection increased by 12% (CI: 3-22%). For each additional  
169 10% increase in canopy cover, the odds of selection increased by 126% (CI: 55-230%).

170

## 171 **DISCUSSION**

172 Northern long-eared bats primarily selected roosts in trees with characteristics that  
173 promote cavity formation. At the tree level, northern long-eared bats selected for large diameter  
174 trees with substantial decay. This corroborates previous work on northern long-eared bats (Jung  
175 et al. 2004; Rojas et al. 2017) and is intuitive because large trees with more decay have more  
176 roost structures (i.e., cavities and loose bark) for bats to use (Reynolds et al. 1985). This is  
177 particularly true of ponderosa pines, which can produce large amounts of resin to defend against  
178 localized physical injury (Lewinsohn et al. 1991; Kane and Kolb 2010) and therefore tend to  
179 develop cavities only when they are scarred or dead. In intensively logged landscapes like the  
180 Black Hills, cavities are found overwhelmingly in snags because most trees are harvested before  
181 they reach ages at which cavities typically form.

182 Conservation actions targeting northern long-eared bats should include preservation of  
183 large snags whenever possible. Our study demonstrated that northern long-eared bats select



184 large-diameter snags (>37 cm), and large diameter snags also tend to remain standing longer than  
185 thinner snags (Bull 1983; Chambers and Mast 2014). These snags need not be tall—short ( $\leq 3$  m)  
186 snags are important resources for male northern long-eared bats as well. Seventeen of 43 (39.5%)  
187 roosts that we located occurred in broken-off snags  $\leq 3$  m in height. These are important  
188 resources and are likely more vulnerable to loss during prescribed fire activities than other  
189 potential roost trees. Snags are often intentionally removed during forest management activities  
190 because of hazards posed to forest management personnel (e.g., loggers and firefighters) and the  
191 general public. However, these short snags pose less danger to forest management personnel and  
192 the public than taller snags, and their preservation is therefore a realistic and actionable step  
193 toward bat conservation.

194         Within plots, snag density predicted roost selection. This is often true of tree-roosting  
195 bats (Weller and Zabel 2001; Bernardos et al. 2004; Kalcounis & Rüppell et al. 2005), and  
196 researchers have generally attributed this to selection for areas in which individuals can readily  
197 switch roosts. We believe, however, that snag density may be an artifact of spatial  
198 autocorrelation between snags on the landscape. Many of the processes that create snags are  
199 spatially autocorrelated (e.g., wildfire, insect outbreaks, disease, and windstorms; Marcot 2017),  
200 and if bats select snags as roost sites, selection for high snag density may be an inevitable (but  
201 non-biologically driven) correlation. Follow-up analysis confirmed that plots centered around  
202 snags contained more snags than plots centered around live trees (Wilcoxon signed-rank test;  $W$   
203 = 9,338;  $p < .0001$ ). However, areas of dense snags are prime targets for conservation to promote  
204 bat populations regardless of whether bats select for snag density *per se* because they contain  
205 more snags per unit of area.

206           Of the variables we considered that may influence thermal characteristics of roosts, only  
207 canopy cover influenced roost selection significantly. Trees were more likely to be used as roosts  
208 as surrounding canopy cover increased, and use was greater than availability at all canopy cover  
209 levels >19%. In a landscape that is largely burned, 40 out of 43 (93.0%) roosts were within or  
210 immediately bordering intact forest stands with live canopy, and all roosts were within 50 m of  
211 intact forest stands. Though many snags were available at our study site in areas burned by a  
212 severe wildfire in 2000, northern long-eared bats use those snags rarely, instead preferring snags  
213 in the interior of forest stands with live canopy. Bats may prefer these areas because canopy  
214 cover creates cooler environments, but they may also simply prefer to be immediately near  
215 forested areas where they forage (Owen et al. 2003; Patriquin and Barclay 2003; Henderson and  
216 Broders 2008). Either way, stand-replacing fire likely poses risks to local populations of northern  
217 long-eared bats at the western edge of its range, where severe wildfire is increasingly prevalent  
218 due to climate change (Westerling et al. 2006). Clearcutting also poses risks to local populations  
219 of northern long-eared bats in these areas, even if snags are retained. Selective logging that  
220 leaves some level of canopy cover remaining would ensure that snag retention is effective for bat  
221 conservation.

222           Dynamics of regional disturbance may be important when evaluating local-scale factors  
223 that influence roost selection (O'Keefe and Loeb 2017). The ponderosa-dominated landscape  
224 where we conducted our research is substantially different than other landscapes (i.e., deciduous  
225 and mixed forests in the eastern United States) where roost selection by northern long-eared bats  
226 has been studied. Although many of the factors driving roost selection appear to be similar  
227 among areas, the processes that create roosts may be fundamentally different in different areas.  
228 Snags in ponderosa pine forests are often generated in large pulses by severe wildfire and

229 mountain pine beetles (*Dendroctonus ponderosae*), but the long-term ramifications of these  
230 resource pulses for bats are not well understood. Severe wildfire appears to create snags that are  
231 largely unused by bats. Mountain pine beetle outbreaks may do the same if beetle-induced  
232 mortality reduces or eliminates canopy cover over large areas, or if outbreaks lead to more severe  
233 fires. Northern long-eared bats may instead depend on snag-generating processes that operate at  
234 more local scales and over longer intervals to create suitable roosts.

235         Roost selection by bats varies by sex, age class, and reproductive condition (Elmore et al.  
236 2004; Hein et al. 2008). Studies on roost selection generally focus on females because they tend  
237 to drive reproduction, which is required to sustain populations. However, targeting roost  
238 conservation toward females exclusively may neglect resources that are important for males.  
239 Because sex ratios can be heavily biased in some areas (Cryan et al. 2000), ignoring the needs of  
240 males could leave resources that are important for most individuals inhabiting these areas  
241 unprotected. On the other hand, designing roost conservation measures on studies of males alone  
242 will leave resources that are important for females unprotected. For example, short ( $\leq 3$  m) snags  
243 are important resources for males, but they may not be for females, which aggregate in maternity  
244 colonies that require larger cavities than largely solitary males (Perry and Thill 2007). Resource  
245 managers seeking to conserve bats should take these sex differences into account when  
246 developing conservation plans and designing studies to inform those plans. In high elevation  
247 areas, males may be more important than females for sustaining local populations because there  
248 are few females in those areas.

249         Forest managers require actionable knowledge to guide conservation, and our results  
250 indicate that conserving large diameter snags within intact forest stands is one such action. Short  
251 ( $\leq 3$  m) snags in particular represent a low-risk, high-reward resource to target for preservation in

252 male-biased, high elevation populations. Conserving these snags may prevent range contraction  
253 and local extinction of federally threatened northern long-eared bats. Although bats face danger  
254 from many threats unrelated to roosts (e.g., white nose syndrome, wind energy development,  
255 etc.), roost conservation remains an important tool for bat conservation in the face of such  
256 threats.

257

258

#### ACKNOWLEDGEMENTS

259 Many thanks to L. Boodoo, C. McFarland, E. Greene, B. Tabor, and B. Phillips for help with  
260 fieldwork; J. Rick for helpful comments on pre-submission versions of this manuscript; and P.  
261 Ortegon, D. Licht, M. Wiles, D. Austin, B. Phillips, and E. Thomas for their logistical support of  
262 this project. Research funding was provided by the National Park Service, the Department of  
263 Zoology and Physiology at the University of Wyoming, the Berry Ecology Center, the American  
264 Society of Mammalogists, Prairie Biotic Research, Inc., and the Wyoming Chapter of The  
265 Wildlife Society. The findings and conclusions in this article are those of the authors and do not  
266 necessarily represent the views of the U.S. Fish and Wildlife Service or the National Park  
267 Service.

268

269

#### SUPPLEMENTARY DATA

270 **Supplementary Data SD1.** Coefficient estimates in the averaged model and 95% confidence  
271 intervals. Bold variables denote significance at  $\alpha = .05$ .

272

273

#### DATA AVAILABILITY

274 \*Data and R scripts will be archived on the lead author’s personal website if this manuscript is  
275 accepted for publication by the Journal of Mammalogy.

276

277

#### LITERATURE CITED

278 ALDRIDGE, H. D. J. N., AND R. M. BRIGHAM. 1988. Load carrying and maneuverability in an  
279 insectivorous bat: a test of the 5% “rule” of radio-telemetry. *Journal of Mammalogy*  
280 69:379–382.

281 BARTON, K. 2018. MuMIn: multi-model inference.

282 BERNARDOS, D. A., C. L. CHAMBERS, AND M. J. RABE. 2004. Selection of Gambel oak roosts by  
283 southwestern myotis in ponderosa pine-dominated forests, northern Arizona. *The Journal*  
284 *of Wildlife Management* 68:595–601.

285 BRIGHAM, R. M., AND M. B. FENTON. 1986. The influence of roost closure on the roosting and  
286 foraging behaviour of *Eptesicus fuscus* (Chiroptera: Vespertilionidae). *Canadian Journal*  
287 *of Zoology* 64:1128–1133.

288 BULL, E. L. 1983. Longevity of snags and their use by woodpeckers. General Technical Report,  
289 Rocky Mountain Research Station, Forest Service, US Department of Agriculture, Fort  
290 Collins, CO.

291 BURNHAM, K. P., AND D. R. ANDERSON. 2002. Model selection and multimodel inference: a  
292 practical information-theoretic approach. 2nd ed. Springer, New York.

293 CACERES, M. C., AND R. M. R. BARCLAY. 2000. *Myotis septentrionalis*. *Mammalian Species*:1–4.

294 CHAMBERS, C. L., AND J. N. MAST. 2014. Snag dynamics and cavity excavation after bark beetle  
295 outbreaks in southwestern ponderosa pine forests. *Forest Science* 60:713–723.

- 296 CHOATE, J. R., AND J. M. ANDERSON. 1997. The bats of Jewel Cave National Monument, South  
297 Dakota. *The Prairie Naturalist* 29:38–47.
- 298 CRYAN, P. M., M. A. BOGAN, AND J. S. ALTENBACH. 2000. Effect of elevation on distribution of  
299 female bats in the Black Hills, South Dakota. *Journal of Mammalogy* 81:719–725.
- 300 DOBSON, A. P., A. D. BRADSHAW, AND A. J. M. BAKER. 1997. Hopes for the future: restoration  
301 ecology and conservation biology. *Science* 277:515–522.
- 302 ELMORE, L. W., D. A. MILLER, AND F. J. VILELLA. 2004. Selection of diurnal roosts by red bats  
303 (*Lasiurus borealis*) in an intensively managed pine forest in Mississippi. *Forest Ecology*  
304 *and Management* 199:11–20.
- 305 FENTON, M. B., I. L. RAUTENBACH, S. E. SMITH, C. M. SWANEPOEL, J. GROSELL, AND J. VAN  
306 JAARVELD. 1994. Raptors and bats: threats and opportunities. *Animal Behaviour* 48:9–  
307 18.
- 308 HALPERN, B. S. ET AL. 2008. A global map of human impact on marine ecosystems. *Science*  
309 319:948–952.
- 310 HANSEN, M. C. ET AL. 2013. High-resolution global maps of 21st-century forest cover change.  
311 *Science* 342:850–853.
- 312 HEIN, C. D., S. B. CASTLEBERRY, AND K. V. MILLER. 2008. Sex-specific summer roost-site  
313 selection by Seminole bats in response to landscape-level forest management. *Journal of*  
314 *Mammalogy* 89:964–972.
- 315 HENDERSON, L. E., AND H. G. BRODERS. 2008. Movements and resource selection of the northern  
316 long-eared myotis (*Myotis septentrionalis*) in a forest—agriculture landscape. *Journal of*  
317 *Mammalogy* 89:952–963.

- 318 HUMPHREY, S. R. 1975. Nursery roosts and community diversity of Nearctic bats. *Journal of*  
319 *Mammalogy* 56:321–346.
- 320 HUNTER, M. L., AND A. HUTCHINSON. 1994. The virtues and shortcomings of parochialism:  
321 conserving species that are locally rare, but globally common. *Conservation Biology*  
322 8:1163–1165.
- 323 JONES, K. R. ET AL. 2018. One-third of global protected land is under intense human pressure.  
324 *Science* 360:788–791.
- 325 JUNG, T. S., I. D. THOMPSON, AND R. D. TITMAN. 2004. Roost site selection by forest-dwelling  
326 male *Myotis* in central Ontario, Canada. *Forest Ecology and Management* 202:325–335.
- 327 KALCOUNIS □ RÜPPELL, M. C., J. M. PSYLLAKIS, AND R. M. BRIGHAM. 2005. Tree roost selection  
328 by bats: an empirical synthesis using meta-analysis. *Wildlife Society Bulletin* 33:1123–  
329 1132.
- 330 KANE, J. M., AND T. E. KOLB. 2010. Importance of resin ducts in reducing ponderosa pine  
331 mortality from bark beetle attack. *Oecologia* 164:601–609.
- 332 KREMEN, C., AND A. M. MERENLENDER. 2018. Landscapes that work for biodiversity and people.  
333 *Science* 362:eaau6020.
- 334 KUNZ, T. H. 1982. Roosting ecology of bats. Pp. 1–55 in *Ecology of Bats* (T. H. Kunz, ed.).  
335 Springer US, Boston, MA.
- 336 KUTNER, M. H. (ED.). 2005. *Applied linear statistical models*. 5th ed. McGraw-Hill Irwin,  
337 Boston.
- 338 LACKI, M. J., D. R. COX, AND M. B. DICKINSON. 2009. Meta-analysis of summer roosting  
339 characteristics of two species of *Myotis* bats. *The American Midland Naturalist* 162:318–  
340 326.

- 341 LESICA, P., AND F. W. ALLENDORF. 1995. When are peripheral populations valuable for  
342 conservation? *Conservation Biology* 9:753–760.
- 343 LEWINSOHN, E., M. GIJZEN, AND R. CROTEAU. 1991. Defense mechanisms of conifers:  
344 differences in constitutive and wound-induced monoterpene biosynthesis among species.  
345 *Plant Physiology* 96:44–49.
- 346 MANEL, S., H. C. WILLIAMS, AND S. J. ORMEROD. 2001. Evaluating presence–absence models in  
347 ecology: the need to account for prevalence. *Journal of Applied Ecology* 38:921–931.
- 348 MANLY, B. F. L., L. McDONALD, D. L. THOMAS, McDONALD, T.L., AND W. P. ERICKSON. 2007.  
349 Resource selection by animals: statistical design and analysis for field studies. Springer  
350 Science & Business Media.
- 351 MARCOT, B. G. 2017. Ecosystem processes related to wood decay. Research Note, US  
352 Department of Agriculture, Forest Service, Pacific Northwest Research Station, Portland,  
353 OR.
- 354 MASER, C., R. G. ANDERSON, AND K. KROMACK, JR. 1979. Dead and down woody material. Pp.  
355 78–95 in *Wildlife habitats in managed forests: the Blue Mountains of Oregon and*  
356 *Washington*. Agricultural Handbook 553. U.S. Department of Agriculture, Forest  
357 Service, Washington, D.C.
- 358 O’KEEFE, J. M., AND S. C. LOEB. 2017. Indiana bats roost in ephemeral, fire-dependent pine  
359 snags in the southern Appalachian Mountains, USA. *Forest Ecology and Management*  
360 391:264–274.
- 361 OWEN, S. F. ET AL. 2003. Home-range size and habitat used by the northern myotis (*Myotis*  
362 *septentrionalis*). *The American Midland Naturalist* 150:352–359.



- 363 PATRIQUIN, K. J., AND R. M. R. BARCLAY. 2003. Foraging by bats in cleared, thinned and  
364 unharvested boreal forest. *Journal of Applied Ecology* 40:646–657.
- 365 PERRY, R. W., AND R. E. THILL. 2007. Roost selection by male and female northern long-eared  
366 bats in a pine-dominated landscape. *Forest Ecology and Management* 247:220–226.
- 367 R CORE TEAM. 2018. R: A language and environment for statistical computing. R Foundation for  
368 Statistical Computing, Vienna, Austria.
- 369 REYNOLDS, R. T., B. D. LINKHART, AND J. JEANSON. 1985. Characteristics of snags and trees  
370 containing cavities in a Colorado conifer forest. USDA Forest Service Research Note,  
371 Rocky Mountain Forest and Range Experiment Station, Fort Collins, CO.
- 372 ROJAS, V. G., J. M. O’KEEFE, AND S. C. LOEB. 2017. Baseline capture rates and roosting habits of  
373 *Myotis septentrionalis* (northern long-eared bat) prior to white-nose syndrome detection  
374 in the Southern Appalachians. *Southeastern Naturalist* 16:140–148.
- 375 SAFI, K., AND G. KERTH. 2004. A comparative analysis of specialization and extinction risk in  
376 temperate-zone bats. *Conservation Biology* 18:1293–1303.
- 377 SAGOT, M., AND G. CHAVERRI. 2015. Effects of roost specialization on extinction risk in bats.  
378 *Conservation Biology* 29:1666–1673.
- 379 SIKES, R. S. 2016. 2016 guidelines of the American Society of Mammalogists for the use of wild  
380 mammals in research and education. *Journal of Mammalogy* 97:663–688.
- 381 SOLICK, D. I., AND R. M. R. BARCLAY. 2006. Thermoregulation and roosting behaviour of  
382 reproductive and nonreproductive female western long-eared bats (*Myotis evotis*) in the  
383 Rocky Mountains of Alberta. *Canadian Journal of Zoology* 84:589–599.
- 384 SWETS, J. A. 1988. Measuring the accuracy of diagnostic systems. *Science* 240:1285–1293.

- 385 VITTINGHOFF, E., AND C. E. McCULLOCH. 2007. Relaxing the rule of ten events per variable in  
386 logistic and Cox regression. *American Journal of Epidemiology* 165:710–718.
- 387 WELLER, T. J., AND C. J. ZABEL. 2001. Characteristics of fringed myotis day roosts in northern  
388 California. *The Journal of Wildlife Management* 65:489.
- 389 WESTERLING, A. L., H. G. HIDALGO, D. R. CAYAN, AND T. W. SWETNAM. 2006. Warming and  
390 earlier spring increase western U.S. forest wildfire activity. *Science* 313:940–943.
- 391 WESTERN REGIONAL CLIMATE CENTER. 2018. NCDC 1981-2010 monthly normals: Custer, SD.  
392 <<https://wrcc.dri.edu/cgi-bin/cliMAIN.pl?sd2087>>.
- 393 WILLIS, C. K. R., AND R. M. BRIGHAM. 2004. Roost switching, roost sharing and social cohesion:  
394 forest-dwelling big brown bats, *Eptesicus fuscus*, conform to the fission–fusion model.  
395 *Animal Behaviour* 68:495–505.
- 396 YACKULIC, C. B., E. W. SANDERSON, AND M. URIARTE. 2011. Anthropogenic and environmental  
397 drivers of modern range loss in large mammals. *Proceedings of the National Academy of*  
398 *Sciences* 108:4024–4029.
- 399

400 **Figures**

401 **Fig. 1.** Unscaled odds ratios associated with each variable in the averaged roost selection model.

402 Error bars represent 95% confidence intervals.

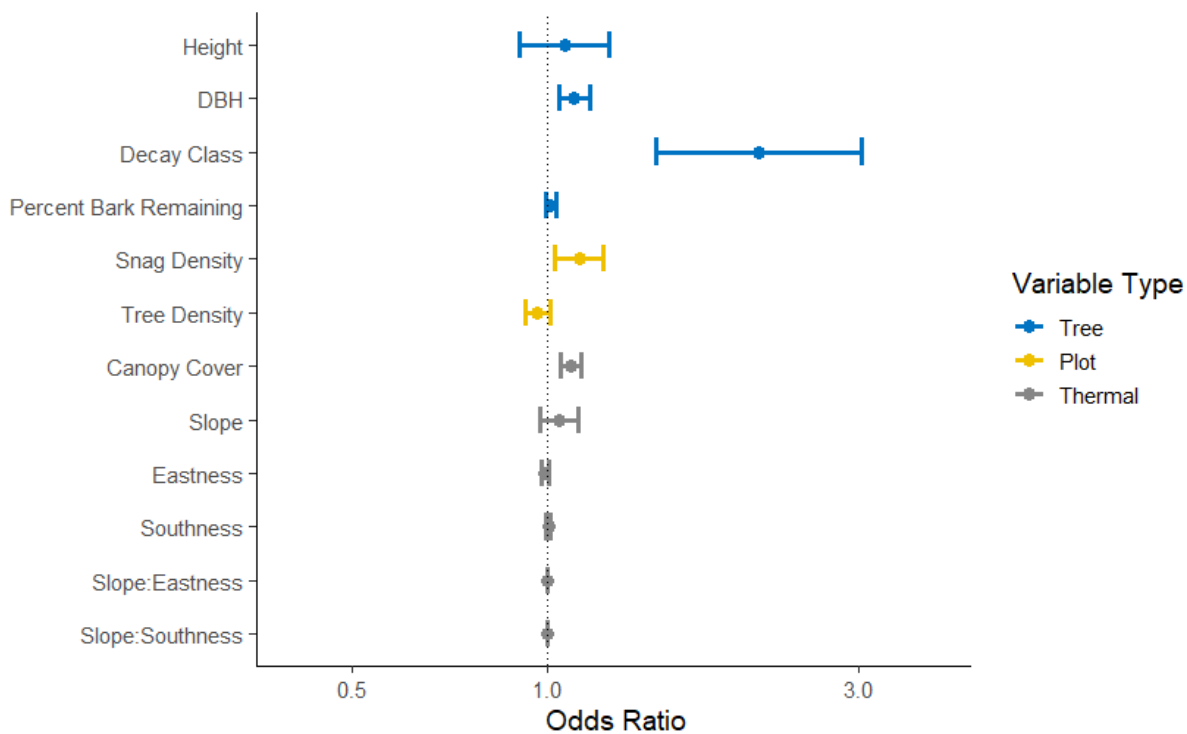

403

404 **Table 1.** Variables measured at used and available summer day-roosts of male northern long-  
405 eared bats (*Myotis septentrionalis*) in the Black Hills of South Dakota, 2017–2018.

| Variable        | Definition                                                                                  |
|-----------------|---------------------------------------------------------------------------------------------|
| DBH             | Tree diameter at breast height (cm)                                                         |
| Height          | Tree height (m)                                                                             |
| Snag            | Tree status (live/dead)                                                                     |
| Decay Class     | Stage of tree decay on ordinal scale                                                        |
| Percent Bark    | Bark remaining on tree stem (%)                                                             |
| Canopy Cover    | Average of 4 canopy cover measurements (N/E/S/W) taken 5 m from tree (%)                    |
| Slope           | Slope of 706.9 m <sup>2</sup> (15 m radius) plot centered at tree (%)                       |
| Tree Density    | Number of trees in 706.9 m <sup>2</sup> plot centered at tree                               |
| Snag Density    | Number of snags in 706.9 m <sup>2</sup> plot centered at tree                               |
| Eastness        | Difference between aspect of 706.9 m <sup>2</sup> plot centered at tree and 90 degrees (°)  |
| Southness       | Difference between aspect of 706.9 m <sup>2</sup> plot centered at tree and 180 degrees (°) |
| Slope:Eastness  | Interaction term between slope and eastness                                                 |
| Slope:Southness | Interaction term between slope and southness                                                |

406

407 **Table 2.** Averaged model coefficients, confidence intervals, and scaled and unscaled odds ratios for significant variables.

| Variable     | Coefficient | Unscaled OR | Scaled OR | Units  | Scaled OR LCL (95%) | Scaled OR UCL (95%) |
|--------------|-------------|-------------|-----------|--------|---------------------|---------------------|
| DBH          | 0.0948      | 1.0994      | 1.6064    | 5 cm   | 1.2103              | 2.1321              |
| Decay Class  | 0.7466      | 2.1098      | 2.1098    | 1 unit | 1.4673              | 3.0337              |
| Snag Density | 0.1120      | 1.1185      | 1.1185    | 1 unit | 1.0257              | 1.2196              |
| Canopy Cover | 0.0816      | 1.0850      | 2.2619    | 10%    | 1.5491              | 3.3026              |

408

409 **Table 3.** Means and standard errors for significant predictors among used and available trees.

| Variable         | <u>Roost</u> |      | <u>Random</u> |      |
|------------------|--------------|------|---------------|------|
|                  | Mean         | SE   | Mean          | SE   |
| DBH (cm)         | 35.69        | 1.57 | 30.33         | 0.69 |
| Decay Class      | 4.96         | 0.33 | 3.72          | 0.18 |
| Snag Density     | 4.74         | 1.03 | 2.16          | 0.24 |
| Canopy Cover (%) | 38.30        | 3.14 | 14.96         | 1.39 |

410

411

412 **Table SD1.** Coefficient estimates in the averaged model and 95% confidence intervals. Bold  
413 variables denote significance at  $\alpha = .05$ .

| Variable               | Estimate      | LCL (95%)     | UCL (95%)     |
|------------------------|---------------|---------------|---------------|
| Height                 | 0.0590        | -0.1006       | 0.2186        |
| <b>DBH</b>             | <b>0.0948</b> | <b>0.0382</b> | <b>0.1514</b> |
| <b>Decay Class</b>     | <b>0.7466</b> | <b>0.3834</b> | <b>1.1098</b> |
| Percent Bark Remaining | 0.0110        | -0.0087       | 0.0307        |
| <b>Snag Density</b>    | <b>0.1120</b> | <b>0.0254</b> | <b>0.1985</b> |
| Tree Density           | -0.0356       | -0.0798       | 0.0087        |
| <b>Canopy Cover</b>    | <b>0.0816</b> | <b>0.0438</b> | <b>0.1195</b> |
| Slope                  | 0.0386        | -0.0288       | 0.1059        |
| Eastness               | -0.0101       | -0.0224       | 0.0023        |
| Southness              | 0.0016        | -0.0065       | 0.0097        |
| Slope:Eastness         | 0.0005        | -0.0002       | 0.0012        |
| Slope:Southness        | 0.0003        | -0.0003       | 0.0009        |

414
